# Supplementary material for: Population Pharmacokinetics of Bedaquiline and Metabolite M2 in Patients With Drug‐Resistant Tuberculosis: The Effect of Time‐Varying Weight and Albumin
Source: PubMed Central journal article supplement — CPT Pharmacometrics Syst Pharmacol. 2016 Nov 8;5(12):682–91. doi: 10.1002/psp4.12147 (PMC5192973; doi:10.1002/psp4.12147), 2016-11-08
Supplement: PSP4-5-682-s002.pdf [file PSP4-5-682-s002.pdf]

Covariate value over time for the typical individual

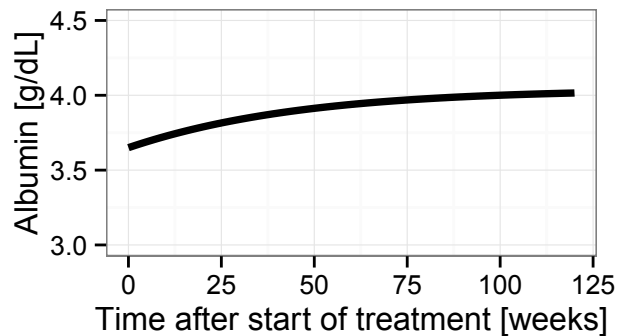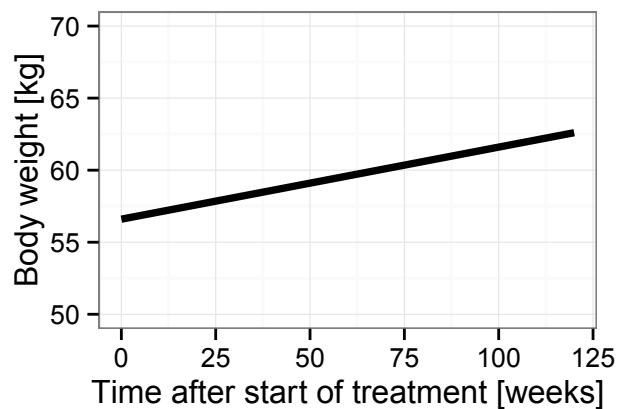

Change per relationship over time

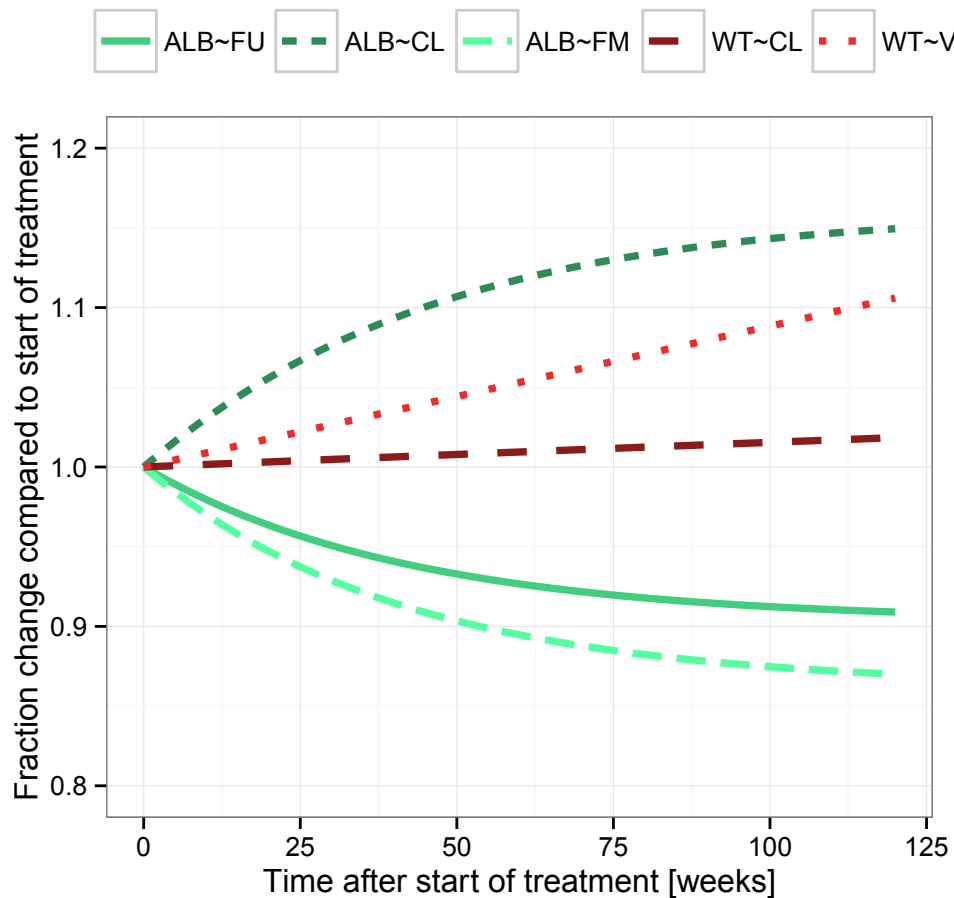

Change per parameter over time

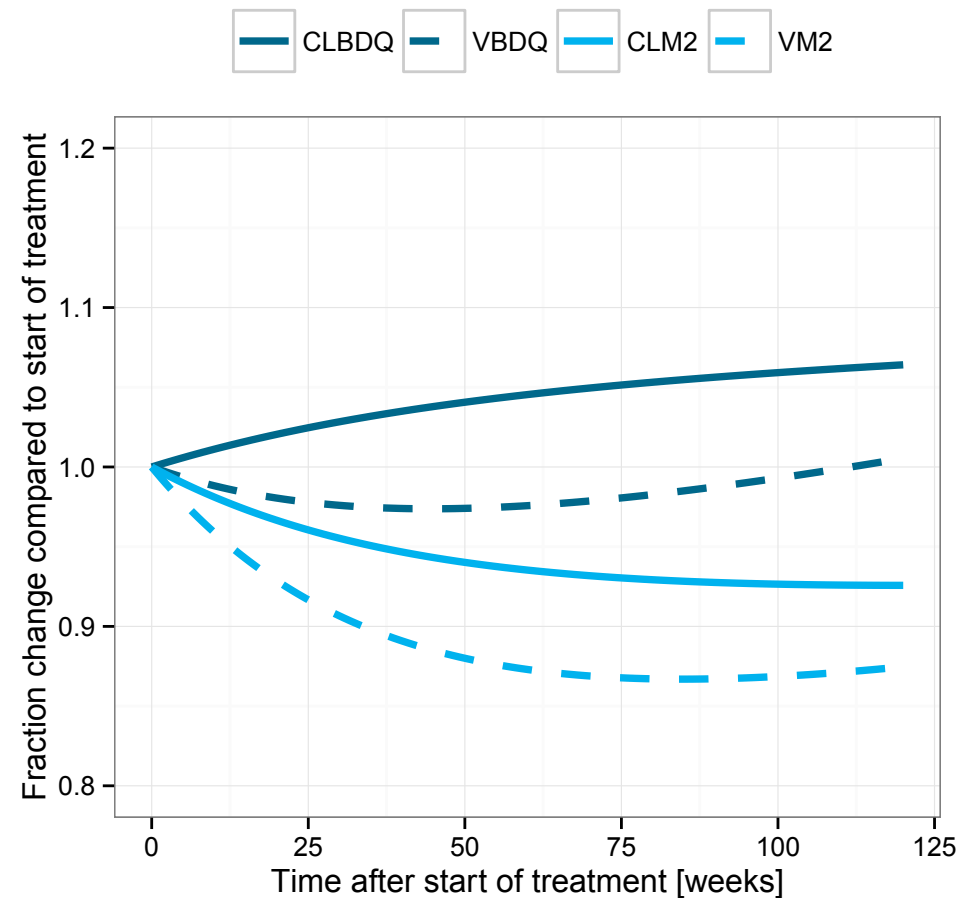

**Figure S2.** Overview of the effects of the relationships between selected PK parameters and time-varying covariate body weight and albumin concentration showing the typical change in the covariates over time on treatment (left panel), the fractional change per relationship over time after start of treatment (middle panel) and total fractional change in selected PK parameters (right panel). Specific individual weight and albumin dynamics yields different total effects on the PK parameters, which can be notably stronger than the typical or even go in the opposite direction.
