# Supplementary material for: Population Pharmacokinetics of Bedaquiline and Metabolite M2 in Patients With Drug‐Resistant Tuberculosis: The Effect of Time‐Varying Weight and Albumin
Source: PubMed Central journal article supplement — CPT Pharmacometrics Syst Pharmacol. 2016 Nov 8;5(12):682–91. doi: 10.1002/psp4.12147 (PMC5192973; doi:10.1002/psp4.12147), 2016-11-08
Supplement: PSP4-5-682-s004.pdf [file PSP4-5-682-s004.pdf]

## Supplemental material

### Protein binding theory

In the covariate analysis, albumin concentrations were used as a surrogate to quantify protein binding. The relationship between plasma protein concentration and unbound fraction ( $f_u$ ) can be derived from equilibrium relations and used to describe the changes in  $f_u$  over the course of treatment ( $f_u(t)$ ). The equilibrium relation is defined as

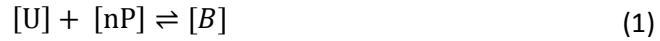

where [U] is the unbound molar concentration, [nP] is the number of unoccupied protein binding sites and [B] is the bound molar concentration. Since the number of occupied binding sites is trivial compared to the total number of binding sites, [nP] can be approximated with  $n[P]$  where  $n$  is the number of binding sites per protein molecule and [P] is the total protein concentration. The association constant ( $K_a$ ) is then given by Equation 2.

$$K_a = \frac{[B]}{[U][nP]} \approx \frac{[B]}{[U][P]n} \quad (2)$$

The unbound fraction is defined by Equation 3.

$$f_u = \frac{[U]}{[U] + [B]} \quad (3)$$

Combining Equation 2 and 3 gives Equation 4.

$$f_u = \frac{1}{1 + nK_a[P]} \quad (4)$$

TB-patients are known to have altered levels of plasma protein compared to healthy persons and the levels change over time of treatment.<sup>1,2</sup> The dynamics of the unbound fraction ( $f_{u,rel}(t)$ ) can be described relative a reference value ( $f_{u,ref}$ ), for example the population or the individual unbound fraction when the plasma protein levels are stable after treatment. Since  $nK_a[P] \gg 1$  for highly bound compounds as BDQ and M2,  $f_{u,rel}(t)$  can be represented by the change in protein levels over the same period as shown by Equation 5.

$$f_{u,rel}(t) = \frac{f_u(t)}{f_{u,ref}} \approx \frac{[P_{ref}]}{[P(t)]} \quad (5)$$

It is here assumed that the intrinsic binding properties ( $K_a$  and  $n$ ) are constant over time on treatment. Furthermore, when albumin can be assumed to be the plasma protein of main importance for the protein binding, [P] can be approximated with the albumin concentration.

### Parameter precision

The SIR procedure was used to determine parameter precision.<sup>3-5</sup> The rationale behind the SIR procedure is to obtain a number of parameter vectors representative of the true parameter uncertainty by sampling them from a pool of vectors generated from any given proposal uncertainty distribution. The sampling process occurs based on sampling probabilities which are proportional to the probability density function of the true uncertainty, called importance ratios. In this work the proposal distribution was a multivariate normal distribution with standard deviations set to an array of standard errors (using the `-cv_theta` and `-cv_omega` options<sup>6</sup>) representing an initial estimate of the uncertainty in each parameter. The initial estimates were based on a successful covariance step for the parameters of the albumin-weight model (estimated separately from the PK) and on a limited bootstrap stratified on study (n=10) for the BDQ and M2 parameters. The initial estimates were rounded upwards to represent a worst case scenario. Correlations between parameters were set to 0. From this proposal distribution, 1000 parameter vectors were sampled, from which 250 were resampled based on their importance ratio. The SIR multivariate Box-Cox distribution estimated from the 250 resampled vectors was then used as a new proposal distribution and the SIR procedure was run repeatedly, each time using the multivariate Box-Cox distribution from the previous step as input for the next, until no change between proposal and SIR distributions was observed. The SIR settings used were 1000 samples and 250 resamples in the 12 first iterations and 2000 samples and 1000 resamples in the 13<sup>th</sup> and last iteration (larger number of resamples to ensure good estimate of 95% confidence interval). SIR diagnostics confirmed that the results of the 13<sup>th</sup> iteration could be considered final.

Parameter precision was presented as 95% confidence intervals. Standard errors can be obtained from the corresponding author if needed.

### References

1. Peresi, E., Silva, S. M. U. R., Calvi, S. A. & Marcondes-Machado, J. Cytokines and acute phase serum proteins as markers of inflammatory regression during the treatment of pulmonary tuberculosis. *J. Bras. Pneumol. Publicação Of. Soc. Bras. Pneumol. E Tisiologia* **34**, 942–949 (2008).
2. Bisaso, K. R. *et al.* Characterizing plasma albumin concentration changes in TB/HIV patients on anti retroviral and anti –tuberculosis therapy. *Silico Pharmacol.* **2**, (2014).
3. Dosne, A.-G., Bergstrand, M. & Karlsson, M. O. *Application of Sampling Importance Resampling to estimate parameter uncertainty distributions.* (PAGE 22, Abstr 2907, Glasgow, Scotland, 2013).
4. Dosne, A.-G., Bergstrand, M. & Karlsson, M. O. *Determination of Appropriate Settings in the Assessment of Parameter Uncertainty Distributions using Sampling Importance Resampling (SIR).* (PAGE 24, Abstr 3546, Crete, Greece, 2015).
5. Dosne, A.-G., Bergstrand, M., Harling, K. & Karlsson, M. O. Improving the Estimation of Parameter Uncertainty Distributions in Nonlinear Mixed Effects Models using Sampling Importance Resampling. *J. Pharmacokinetic. Pharmacodyn.* **Accepted**, (2016).
6. PsN user guide: SIR [http://psn.sourceforge.net/pdfdocs/sir\\_userguide.pdf](http://psn.sourceforge.net/pdfdocs/sir_userguide.pdf).

### *NONMEM 7.3 code for final model including covariates*

\$PROBLEM BDQ and M2 popPK in patients plus time varying albumin and weight

\$INPUT ID OCC TIME TAD EVID MDV AMT FLAG DVMG LNDVMG DVMOL DV L2 SEX RACE AGE WT  
ALB HIV TBTYPE

\$DATA dataset.csv IGNORE=@

\$SUBROUTINE ADVAN13 TOL=6

\$MODEL NCOMPARTMENTS=8

COMP=(DEPOT DEFDOSE)

COMP=(BDQC)

COMP=(BDQPERI1)

COMP=(BDQPERI2)

COMP=(M2)

COMP=(TRANSI1)

COMP=(TRANSI2)

COMP=(ALBUMIN)

\$PK

;--- Model for Albumin

TVX0 = THETA(1)

TVXSS = THETA(2)

TVREP = THETA(3)

BSVX0 = ETA(1)

BSVXSS = ETA(2)

BSVREP = ETA(3)

SHPX0 = THETA(4)

PHIX0 = EXP(BSVX0)

PHI2X0 = (PHIX0\*\*SHPX0-1)/SHPX0 ; Box-cox transformation

SHPXSS = THETA(5)

PHIXSS = EXP(BSVXSS)

PHI2XSS = (PHIXSS\*\*SHPXSS-1)/SHPXSS ; Box-cox transformation

X0 = TVX0\*EXP(PHI2X0)

XSS = TVXSS\*EXP(PHI2XSS)

REP = TVREP\*EXP(BSVREP)

HL = LOG(2)/REP

A\_0(8) = X0

;--- Model for WT

TVWT0 = THETA(6)  
TVWT120 = THETA(7)  
  
BSVWT0 = ETA(4)  
BSVWT120 = ETA(5)  
  
SHPWT120 = THETA(8)  
PHIWT120 = EXP(BSVWT120)  
PHI2WT120 = (PHIWT120\*\*SHPWT120-1)/SHPWT120 ; Box-cox transformation

WT0 = TVWT0\*EXP(BSVWT0)  
WT120 = TVWT120\*EXP(PHI2WT120)  
SLOPE = (WT120 - WT0)/(120\*7\*24) ; TIME in hours, 120 weeks

;--- BDQ and M2 PK

;--- Typical values fixed effects

TVMAT = THETA(9)  
TVFR = THETA(10)  
TVCL= THETA(11)  
TVV= THETA(12)  
TVQ1 = THETA(13)  
TVVP1 = THETA(14)  
TVQ2 = THETA(15)  
TVVP2 = THETA(16)  
TVCLM2 = THETA(17)  
TVVM2 = THETA(18)

;--- Typical values variability

BOVF = ETA(6)  
IF(OCC.EQ.2) BOVF = ETA(7)  
BOVMAT = ETA(8)  
IF(OCC.EQ.2) BOVMAT = ETA(9)  
BSVF = ETA(10)  
BSVCL= ETA(11)  
BSVCLM2= ETA(12)  
BSVV= ETA(13)  
BSVQ1= ETA(14)  
BSVVM2= ETA(15)

;--- Covaraiate model

;--- Mechanistic

; Allomertic scaling and albumin effects coded in \$DES and \$ERROR since they are time changing

;--- Empiric

; Effect of Black race on CL

BLACK = 0

IF(RACE.EQ.2) BLACK=1

BLACKCL = 1 + BLACK\*THETA(23)

; AGE on CL

AGECL = 1 + (32-AGE)\*(THETA(24))

;--- Parameters

PHI = LOG(TVMAT/(1-TVMAT))+BOVMAT

MAT = 6\*EXP(PHI)/(EXP(PHI)+1)

; Mean absorption time, overall time for both delay and 90% complete absorption, logit transformed

; to retain constraints even with BOV in MAT

FR = TVFR ; Fraction of MAT that is delay

MTT = MAT\*FR

KAHL= MAT\*(1-FR)/3.3

KA = LOG(2)/KAHL

KTR= 2/MTT

F1= 1.8002\*EXP(BOVF+BSVF)

; AMT in mg in input file, MW TMC207 555.5 g/mol, DV as nmol/mL =  $\mu\text{mol/L}$  -->

;(AMT/1000)/(555.5)\*1000000 = AMT\*1.8002  $\mu\text{mol}$

CLB = TVCL\*BLACKCL\*AGECL\*EXP(BSVCL)

VB = TVV\*EXP(BSVV)

Q1B= TVQ1\*EXP(BSVQ1)

VP1B = TVVP1

Q2B = TVQ2

VP2B= TVVP2

CLM2B = TVCLM2\*BLACKCL\*AGECL\*EXP(BSVCLM2)

VM2B= TVVM2\*EXP(BSVVM2)

\$DES

; --- Albumin

DADT(8) = LOG(2)/(HL\*7\*24)\*A(8)\*(1- A(8)/XSS) ; Time in hours, unit of half life: weeks

; --- Body weight

WTTIME = WT0 + T\*SLOPE ; Predicted individual WT at time T

; --- Time varying covariates

ALBRELI = A(8)/XSS

; Time varying individual albumin relative individual value albumin at SS

COVALBI = (ALBRELI)\*\*THETA(22) ; Albumin effect on hepatic function --> CL

FM = (ALBRELI)\*\*(-THETA(22)) ; Albumin effect on hepatic function --> fm

ALLCL = (WTTIME/70)\*\*THETA(19) ; Allometric scaling CL/Q  
ALLV = (WTTIME/70)\*\*THETA(20) ; Allometric scaling V/VP

; --- BDQ and M2 PK

CL = CLB\*COVALBI\*ALLCL  
V = VB\*ALLV  
Q1 = Q1B\*ALLCL  
VP1 = VP1B\*ALLV  
Q2 = Q2B\*ALLCL  
VP2 = VP2B\*ALLV  
CLM2 = CLM2B/FM\*COVALBI\*ALLCL  
VM2 = VM2B/FM\*ALLV

DADT(1) = -KTR\*A(1)  
DADT(2) = A(7)\*KA - A(2)\*CL/V - A(2)\*Q1/V + A(3)\*Q1/VP1 - A(2)\*Q2/V + A(4)\*Q2/VP2 ; BDQ  
DADT(3) = A(2)\*Q1/V - A(3)\*Q1/VP1  
DADT(4) = A(2)\*Q2/V - A(4)\*Q2/VP2  
DADT(5) = A(2)\*CL/V - A(5)\*CLM2/VM2 ; M2  
DADT(6) = A(1)\*KTR - A(6)\*KTR ; transit1  
DADT(7) = A(6)\*KTR - A(7)\*KA ; transit2

\$ERROR

; --- Body weight

WTTIMEE = WT0 + TIME\*SLOPE

; --- Time varying covariates

FURELIP = THETA(2)/A(8)

; Time varying individual fraction unbound relative typical population value at SS (inversely  
;proportional to albumin)

COVFUIP = (FURELIP)\*\*THETA(21) ; Fu effect on V

ALBRELIE = A(8)/XSS

; Time varying individual albumin relative individual value albumin at SS

FME = (ALBRELIE)\*\*(-THETA(22)) ; Albumin effect on hepatic function --> fm

ALLCLE = (WTTIMEE/70)\*\*THETA(19) ; Allometric scaling CL/Q

ALLVE = (WTTIMEE/70)\*\*THETA(20) ; Allometric scaling V/VP

; --- BDQ and M2 PK

VE = VB\*ALLVE\*COVFUIP  
VM2E = VM2B/FME\*ALLVE\*COVFUIP

; FLAG 1 = BDQ PK, 2= M2 PK, 3= Albumin, 4= Body weight

DEL = 1E-12

IPRED = LOG(A(2)/VE + DEL)

IF(FLAG.EQ.2) IPRED=LOG(A(5)/VM2E+DEL)  
IF(FLAG.EQ.3) IPRED = A(8)  
IF(FLAG.EQ.4) IPRED = WTTIMEE

; Error additive on log scale for PK, proportional for albumin and weight

BSVRUV1= ETA(16)

BSVRUV2= ETA(17)

W = 1\*EXP(BSVRUV1)

IF(FLAG.EQ.2) W = 1\*EXP(BSVRUV2)

IF(FLAG.EQ.3) W = IPRED

IF(FLAG.EQ.4) W = IPRED

IF(W.EQ.0) W=1

IRES=DV-IPRED

IWRES=IRES/W

Y = IPRED + W\*EPS(3)

IF(FLAG.EQ.2) Y = IPRED + W\*EPS(4)

IF(FLAG.EQ.3) Y = IPRED + W\*EPS(1)

IF(FLAG.EQ.4) Y = IPRED + W\*EPS(2)

\$THETA

; --- Albumin

(0,3.64865) ; 1 X0 g/dl

(0,4.04068) ; 2 Xss g/dl

(0,0.03399109) ; 3 Rate constant return to normal 1/week

-2.43936 ; 4 shape factor BSVX0 boxcox

-5.37749 ; 5 shape factor BSVXSS boxcox

; --- Body weight

(0,56.6371) ; 6 WT0 kg

(0,62.6425) ; 7 WT120 kg

-0.416034 ; 8 Boxcox BSV WT120

; --- BDQ and M2 PK

(1E-06,0.662045,1) ; 9 MAT

(1E-06,0.466443,1) ; 10 FR

(1E-06,2.61592) ; 11 CL

(1E-06,198.34) ; 12 V

(1E-06,3.658) ; 13 Q1

(1E-06,8549.06) ; 14 VP1

(1E-06,7.33504) ; 15 Q2

(1E-06,2690.91) ; 16 VP2

(1E-06,10.0496) ; 17 CLM2

(1E-06,2203.71) ; 18 VM2

```

; --- Covariates
(1E-06,0.180912) ; 19 Allometric scaling baseline CL
(1E-06,1) FIX ; 20 Allometric scaling V
(1E-06,1) FIX ; 21 Time varying FU on BDQ+M2 disp
(-10,1.64021,10) ; 22 Individual time varying effect of ALB BDQ+M2 CL
(0,0.838743) ; 23 Effect of black race on CL/CM2
(0,0.00880756,10) ; 24 AGE effect on CL/CLM2

; --- Albumin and body weight
$OMEGA BLOCK(5)
0.0253964 ; 1 BSVX0
0.00787165 0.00965573 ; 2 BSVXSS
-0.0831085 0.00887115 0.979314 ; 3 BSVREP
0.0117627 0.00499615 -0.0379866 0.0421083 ; 4 BSVWTO
0.00559706 0.00649501 -0.00226264 0.0369625 0.0494914 ; 5 BSVRWT120

; --- BDQ and M2 PK
$OMEGA BLOCK(1)
0.0382322 ; 6 BOV F
$OMEGA BLOCK(1) SAME

$OMEGA BLOCK(1)
1.16205 ; 8 BOV MAT
$OMEGA BLOCK(1) SAME

$OMEGA 0.0803271 ; 10 BSV F

$OMEGA BLOCK(2)
0.152776 ; 11 BSV CL
0.13486 0.212124 ; 12 BSV CLM2

$OMEGA
0.171909 ; 13 BSV V
0.181182 ; 14 BSV Q1
0.150223 ; 15 BSV VM2

$OMEGA BLOCK(2)
0.05392 ; 16 BSV RUVBDQ
0.0295137 0.0522882 ; 17 BSV RUVM2

$SIGMA
0.00500974 ; 1 Prop error ALB
0.00114573 ; 2 Prop error WT

$SIGMA BLOCK(2)
0.0518161 ; 3 Prop error TMC
0.0189319 0.0366836 ; 4 Prop error M2

```



\$ESTIMATION METHOD=1 MAXEVAL=9999 PRINT=1 SIGL=9 NSIG=3 NOABORT INTERACTION  
MSFO=runXXX.msf  
\$COVARIANCE UNCONDITIONAL

\$TABLE ID TIME TAD EVID FLAG DV PRED IPRED RES IRES WRES IWRES CWRES NPDE NOPRINT  
ONEHEADER NOAPPEND FILE=sdtabXXX

\$TABLE ID KA MAT FR MTT CL V Q1 VP1 Q2 VP2 CLM2 VM2 X0 XSS REP WT0 WT120 BOVF BOVMAT  
BSVF BSVCL BSVV BSVQ1 BSVCLM2 BSVVM2 BSVRUV1 BSVRUV2 BSVX0 BSVXSS BSVREP BSVWT0  
BSVWT120 NOPRINT NOAPPEND ONEHEADER FILE=patabXXX

\$TABLE ID AGE HT WT WTTIME ALB NOPRINT NOAPPEND ONEHEADER FILE=cotabXXX

\$TABLE ID SEX RACE TBTYPE NOPRINT NOAPPEND ONEHEADER FILE=catabXXX

\$TABLE ID STUDY TIME TAD DV DVMG PRED IPRED RES IRES WRES IWRES CWRES NPDE EVID KA MAT  
FR MTT CL V Q1 VP1 Q2 VP2 CLM2 VM2 BOVF BOVMAT BSVF BSVCL BSVV BSVQ1 BSVCLM2 BSVVM2  
BSVRUV1 BSVRUV2 FLAG WT WTTIME HIV STRT ALB ALB2 WTTIME NOPRINT NOAPPEND  
ONEHEADER FILE=mytabXXX.tab
