# Supplementary figures and images for: Population Pharmacokinetics of Bedaquiline and Metabolite M2 in Patients With Drug‐Resistant Tuberculosis: The Effect of Time‐Varying Weight and Albumin
Source: PubMed Central journal article supplement — CPT Pharmacometrics Syst Pharmacol. 2016 Nov 8;5(12):682–91. doi: 10.1002/psp4.12147 (PMC5192973; doi:10.1002/psp4.12147), 2016-11-08

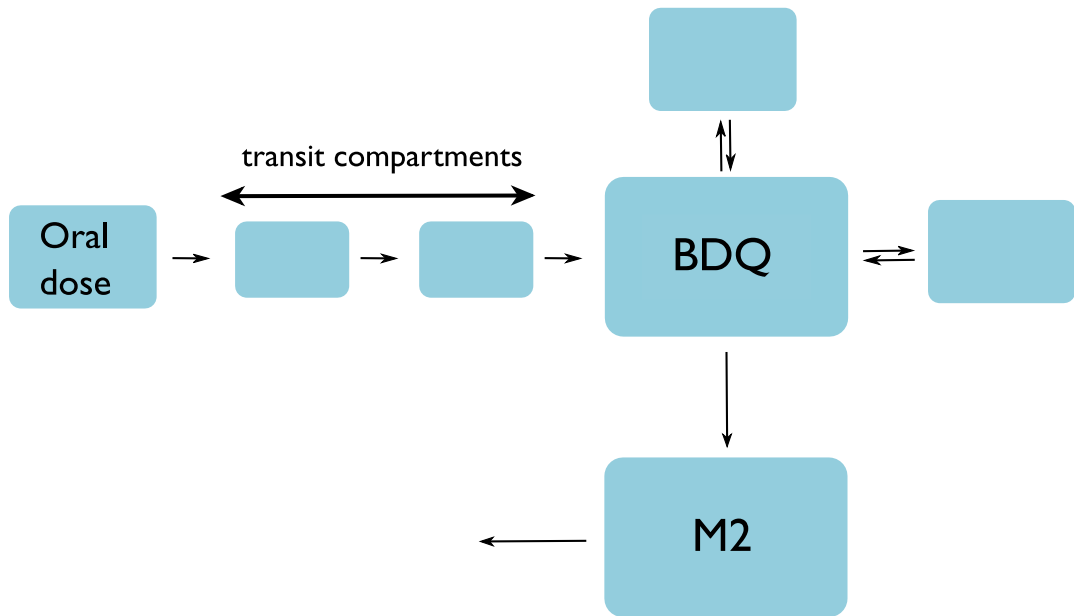

**Figure S1.** Schematic figure of final model structure.

Supplement: PSP4-5-682-s001.pdf [file PSP4-5-682-s001.pdf]
